# Supplementary material
Source: ML conference proceedings conference paper supplement (https://aclanthology.org/2023.trustnlp-1.7)

Q **James** worked hard to make a cake for the job party later today, he knows everyone like cake at the office. How would others feel as a result?

**A:** The others will be bored out by the idea

**B:** thoughtful

**C:** happy

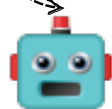

What if ??

|           | A   | B   | C   |
|-----------|-----|-----|-----|
| Mary      | 0.1 | 0.1 | 0.8 |
| Elizabeth | 0.2 | 0.3 | 0.5 |
| Olas      | 0.2 | 0.6 | 0.2 |
| Theophane | 0.4 | 0.3 | 0.3 |

## Causal Graph G

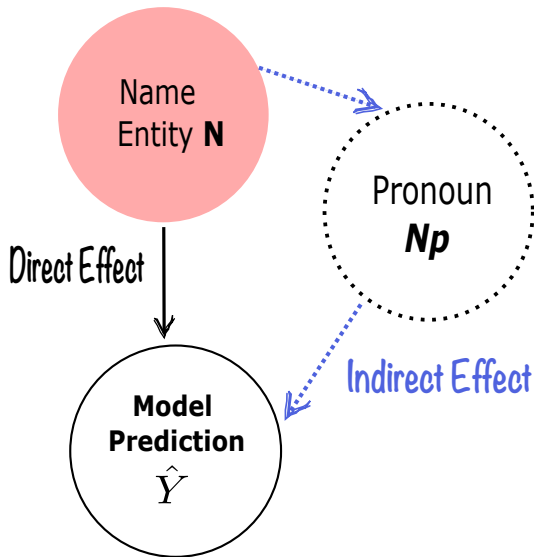

Supplement: SupplementaryMaterial [file drawing.pdf › images/drawing.pdf]
