# Supplementary material
Source: ML conference proceedings conference paper supplement (https://aclanthology.org/2023.trustnlp-1.7)

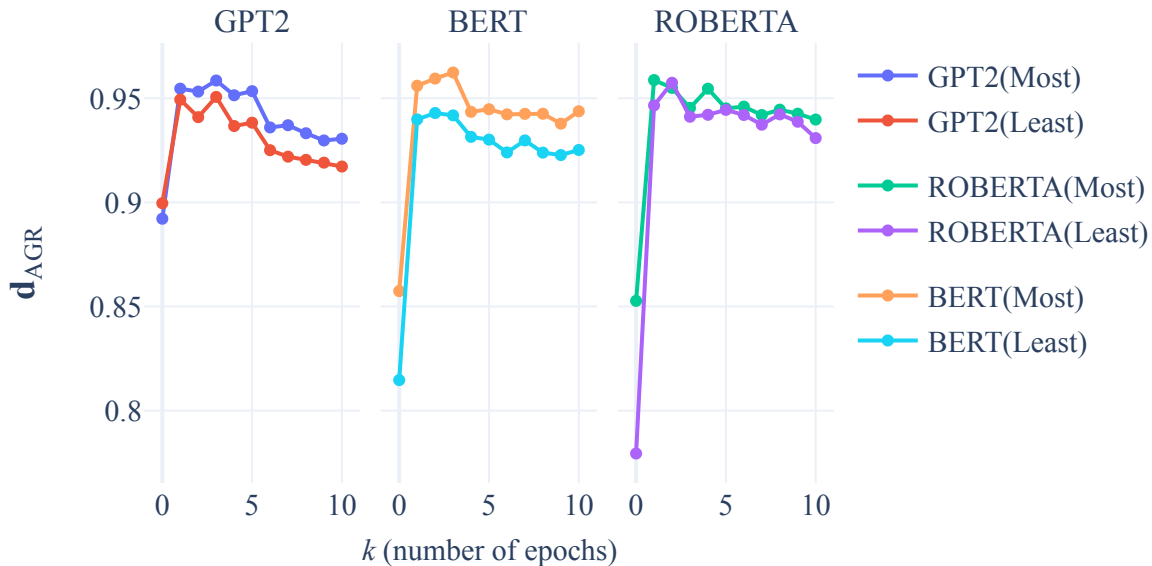

Supplement: SupplementaryMaterial [file newplot.pdf › images/newplot.pdf]

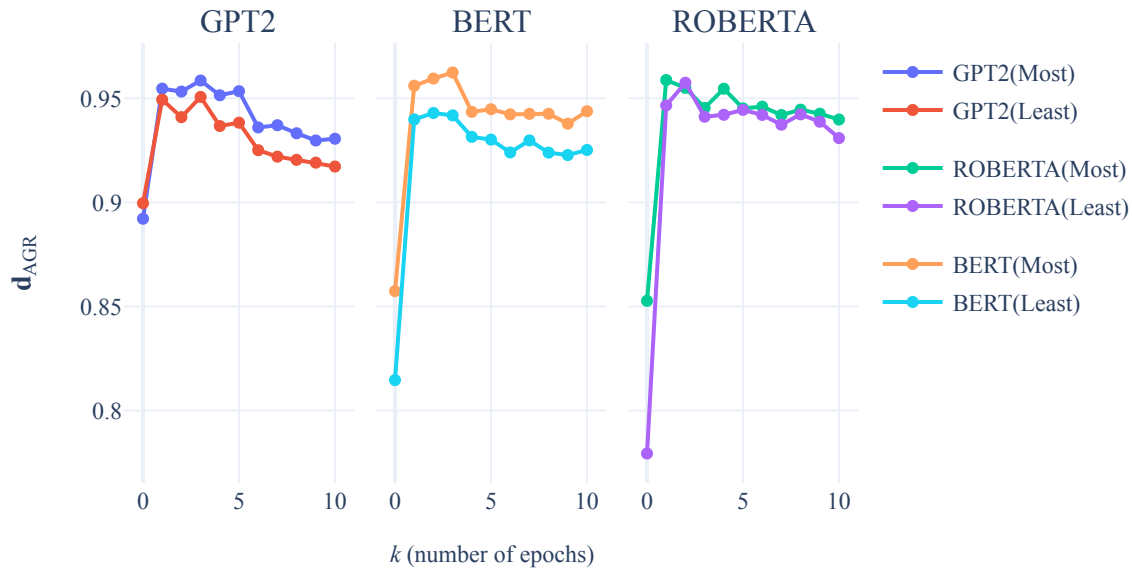

Supplement: SupplementaryMaterial [file newplot1.pdf › images/newplot1.pdf]

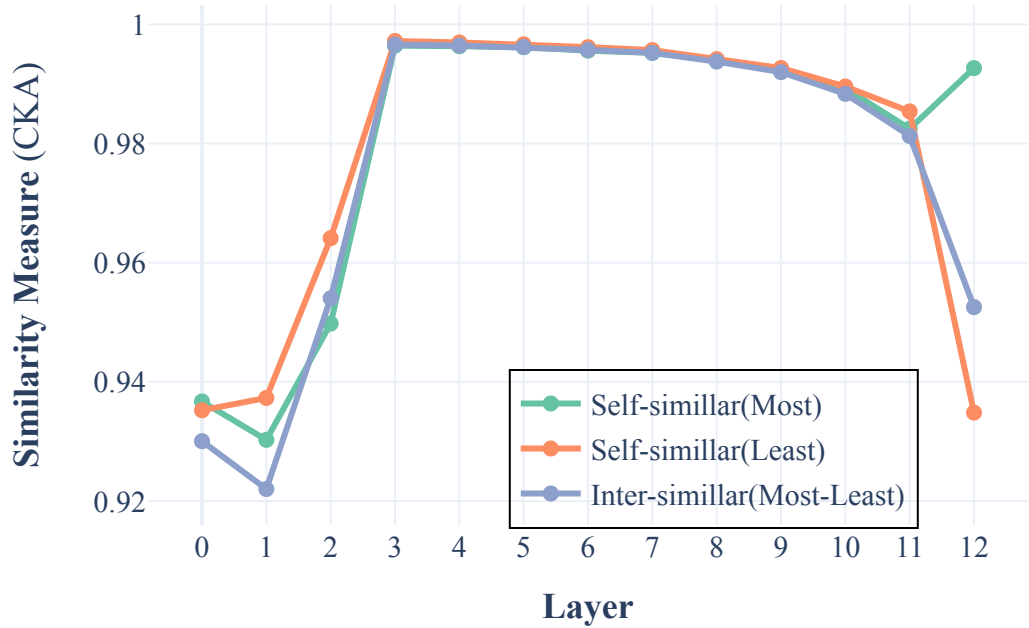

Supplement: SupplementaryMaterial [file similarity_CKA.pdf › images/similarity_CKA.pdf]

Similarity Measure (Cosine)

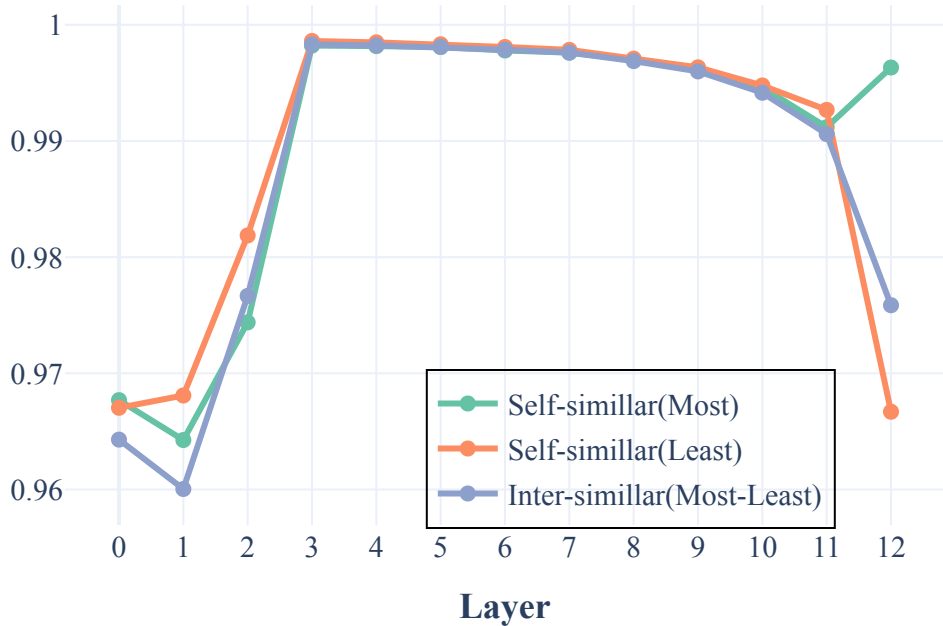

Supplement: SupplementaryMaterial [file similarity_Cosine.pdf › images/similarity_Cosine.pdf]

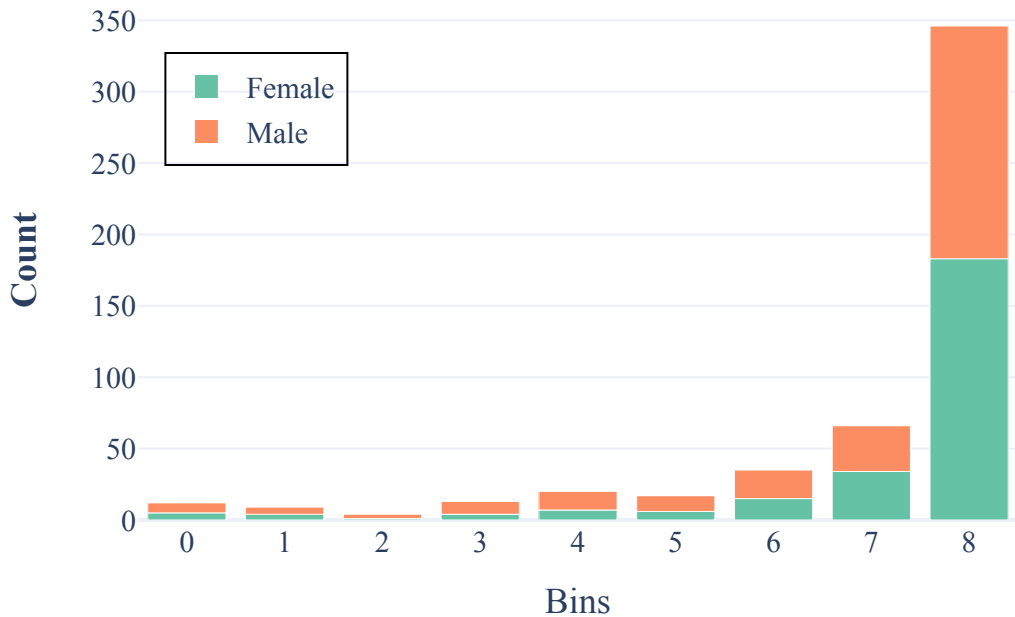

Supplement: SupplementaryMaterial [file train_name_count.pdf › images/train_name_count.pdf]

Log Frequency

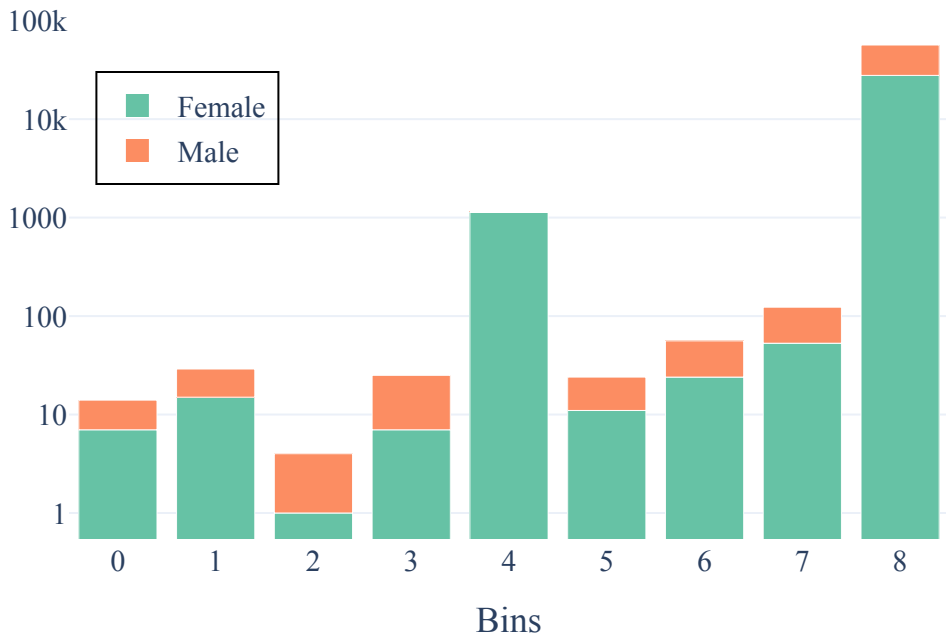

Supplement: SupplementaryMaterial [file train_name_count_weight.pdf › images/train_name_count_weight.pdf]
